# Supplementary material for: Genetic and clinical characteristics of PROM1-related retinal degeneration in Korean
Source: PubMed Central journal article supplement (PMC10711002; doi:10.1038/s41598-023-49131-z), 2023-12-11

## **Genetic and Clinical Characteristics of PROM1-related Retinal Degeneration in Korean**

Sungsoon Hwang, MD<sup>1,2</sup>; Se Woong Kang, MD, PhD<sup>1</sup>; Ja-Hyun Jang, MD, PhD<sup>3</sup>; Sang Jin Kim, MD, PhD<sup>1</sup>

<sup>1</sup>Department of Ophthalmology, Samsung Medical Center, Sungkyunkwan University School of Medicine, Seoul, Republic of Korea

<sup>2</sup>Department of Clinical Research Design and Evaluation, Samsung Advanced Institute for Health Sciences and Technology (SAIHST), Sungkyunkwan University, Seoul, Republic of Korea

<sup>3</sup>Department of Laboratory Medicine and Genetics, Samsung Medical Center, Sungkyunkwan University School of Medicine, Seoul, Republic of Korea

### **Correspondence**

Sang Jin Kim, MD, PhD

Department of Ophthalmology, Samsung Medical Center, Sungkyunkwan University School of Medicine, #81 Irwon-ro, Gangnam-gu, Seoul 06351, Republic of Korea

Tel: 82-2-3410-3548, Fax: 82-2-3410-0074

E-mail: sangjin.kim.md@gmail.com

**Supplemental Figure 1.** Pedigrees of seven patients from five families of PROM1-related inherited retinal disease.

**Family No. 1**

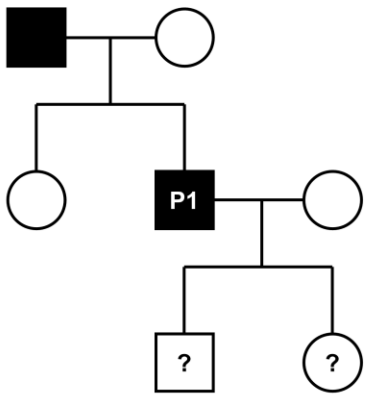

**Family No. 2**

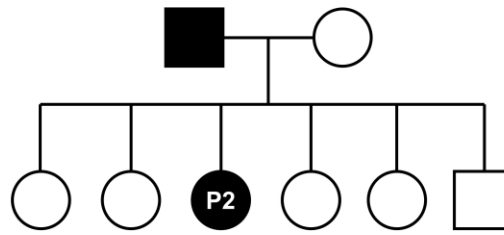

**Family No. 3**

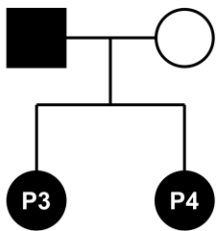

**Family No. 4**

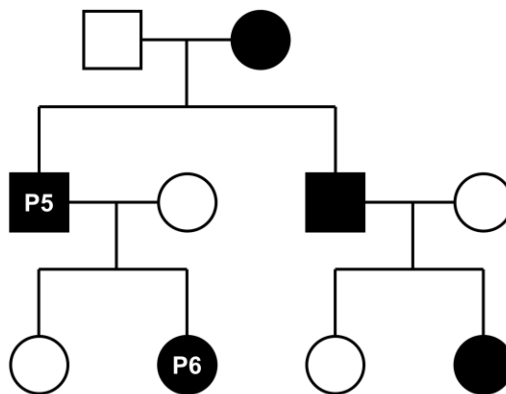

**Family No. 5**

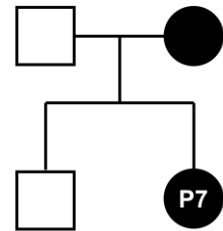

Supplement: 41598_2023_49131_MOESM1_ESM.pdf [file 41598_2023_49131_MOESM1_ESM.pdf]
